# Supplementary material
Source: PubMed Central journal article supplement (PMC2648228)
Supplement: supp_29_6_1635__1.pdf [file supp_29_6_1635__1.pdf]

## Oligonucleotide primers used in *Materials & Methods* protocols and PCR conditions

### Human PBGD promoter cloning: Nested PCR

| Name  | Sequence                         | Description                  |
|-------|----------------------------------|------------------------------|
| 00-25 | 5'-GCTGAGTCAGGAGAATCGCTTGAACC-3' | Fwd human PBGD (1st round)   |
| 00-26 | 5'-AACCTTCCTCAGTACCTTCTGCCCTC-3' | Rev human PBGD (1st round)   |
| 99-15 | 5'-GTAGTGAGCCTAGGTCACGCCA-3'     | Fwd human PBGD (2nd round) * |
| 99-16 | 5'-GGTCCCTTTAACCTTCCTCAGT-3'     | Rev human PBGD (2nd round)   |

\* generates an AvrII site

### Gene expression: quantitative real-time PCR

| Name  | Sequence                          | Description                                                     |
|-------|-----------------------------------|-----------------------------------------------------------------|
| 05-22 | 5'-GCCTTTGCTAAGCTGAGTGAG-3'       | Fwd human $\epsilon$ -globin                                    |
| 05-23 | 5'-TTGCCAAAGTGAGTAGCCAGAA-3'      | Rev human $\epsilon$ -globin                                    |
| 05-08 | 5'-AATAAGCTCCTAGTCCAGACGC-3'      | Fwd human $\gamma$ -globin *                                    |
| 05-09 | 5'-TCCCTCTAGTCTCTGCTTCTCT-3'      | Fwd human PBGD <sup>A</sup> $\gamma$ -globin                    |
| 05-07 | 5'-TAGACAACCAGGAGCCTTCC-3'        | Rev human <sup>A</sup> $\gamma$ + <sup>G</sup> $\gamma$ -globin |
| 05-05 | 5'-GCAAGGTGAACGTGGATGAAGT-3'      | Fwd human $\delta$ + $\beta$ -globin                            |
| 05-06 | 5'-TAACAGCATCAGGAGTGGACAGA-3'     | Rev human $\delta$ + $\beta$ -globin                            |
| 06-24 | 5'-CTCAAGGGCACCTTTGCCACA-3'       | Fwd human $\beta$ -globin                                       |
| 06-25 | 5'-TGGGGTGAATTCTTTGCCAAAGTGAT-3'  | Rev human $\beta$ -globin                                       |
| 06-26 | 5'-CAACCTCAAGGGCACTTTTTCTCA-3'    | Fwd human $\delta$ -globin                                      |
| 06-27 | 5'-GGTGAATTCCTTGCCAAAGTTGC-3'     | Rev human $\delta$ -globin                                      |
| 05-01 | 5'-GCTACCAGGGCCTTTGAGATG-3'       | Fwd mouse S16                                                   |
| 05-02 | 5'-AGGAGCGATTTGCTGGTGTGG-3'       | Rev mouse S16                                                   |
| 05-20 | 5'-CAGCCGAATGACAAAGAAAAGTTCA-3'   | Fwd mouse glycophorinA                                          |
| 05-21 | 5'-CAAACATTGGAGGACTCTTCATTAGGA-3' | Rev mouse glycophorinA                                          |

### PCR conditions:

15 min at 95°C followed by 45 cycles of 94°C, 30s; 60°C, 30s; and 72°C, 30s.

\* <sup>G</sup> $\gamma$  + <sup>A</sup> $\gamma$ -globin in  $\beta$ -YAC mouse and only <sup>G</sup> $\gamma$ -globin in PBGD<sup>A</sup> $\gamma$ -YAC mice
